# Supplementary material
Source: HighWire-hosted journal article supplement (https://www.cmajopen.ca/highwire/filestream/89120/field_highwire_adjunct_files/1/open-2021-0319-original-submission.pdf)
Supplement: open-2021-0319-original-submission.pdf [file open-2021-0319-original-submission.pdf]

1  
2  
3 **1 Supply and Demographic Characteristics of Ontario's Ophthalmologists from 2010-2019:**  
4 **2 A Population-Based Analysis**  
5  
6 3

7 4 Aman P. Sayal MPH, MD (C)<sup>1</sup>, Yusuf Ahmed MD(C)<sup>1</sup>, Marko M. Popovic MPH(C), MD<sup>2</sup>,  
8 5 Matthew Schlenker MD, MSc<sup>2</sup>, Robert J. Campbell MD, MSc<sup>3</sup>, Jasmin Kantarevic PhD<sup>4</sup>, Joanna  
9 6 Nadolski MA, MHSc<sup>4</sup>, Karen D'Souza MA<sup>4</sup>, Sherif El-Defrawy MD, PhD<sup>2</sup>  
10 7

11 8 <sup>1</sup>Faculty of Medicine, University of Toronto, Toronto, Ontario, Canada

12 9 <sup>2</sup>Department of Ophthalmology and Vision Sciences, University of Toronto, Toronto, Ontario,  
13 10 Canada

14 11 <sup>3</sup>Department of Ophthalmology, Queen's University and Kingston Health Sciences Centre,  
15 12 Kingston, Ontario, Canada

16 13 <sup>4</sup>Department of Economics, Policy & Research, Ontario Medical Association, Toronto, Ontario  
17 14  
18 15  
19 16  
20 17  
21 18  
22 19

23 18 **Correspondence:** Dr. Sherif El-Defrawy MD, PhD  
24 19 **Address:** Kensington Eye Institute  
25 20 340 College Street #600  
26 21 Toronto, Ontario, Canada  
27 22 M5T 3A9  
28 23 Phone: (416) 928-2132  
29 24 Email: seldefrawy@kensingtonhealth.org  
30 25  
31 26

32 26 **Financial Support: Nanji family Chair Fund**

33 27 **Conflicts of Interest: None**

34 28 **Declaration of Interest: None**

35 29 **Abstract Word Count: 250**

36 30 **Word Count: 2,500**

37 31 **Number of Figures: 6**

38 32 **Number of Tables: 4**

39 33 **Supplementary Tables: 1**

40 34 **Acknowledgement:** We would like to thank the Eye Physicians and Surgeons of Ontario  
41 35 (EPSO) for their written support of this project and for the Ontario Medical Association's  
42 36 Department of Economics, Policy & Research for their contribution to data collection and  
43 37 analysis.  
44 38  
45 39  
46 40  
47 41  
48 42  
49 43  
50 44  
51 45  
52 46  
53 47  
54 48  
55 49  
56 50  
57 51  
58 52  
59 53  
60 54

1  
2  
3 **47 ABSTRACT**

4 **48 BACKRGOUND:** Ontario continues to have a rapidly aging population. Ophthalmologists  
5  
6  
7 **49** provide most of their care to the elderly, which has prominent human resource implications when  
8  
9 **50** considering that the utilization of ophthalmic services is highest amongst older individuals.  
10  
11 **51** Therefore, this study investigated the supply and demographic characteristics of Ontario's  
12  
13 **52** ophthalmologists.  
14  
15

16 **53**  
17  
18 **54 METHODS:** In this retrospective, population-based analysis, cohort demographics including  
19  
20 **55** sex and career stage of Ontario's ophthalmologists from 2010-2019 were evaluated and reported  
21  
22 **56** using descriptive statistics. Ophthalmologist supply within different areas of care were similarly  
23  
24 **57** detailed using descriptive statistics.  
25  
26

27 **58**  
28  
29 **59 RESULTS:** Over the study period, a median of 464 ophthalmologists were practicing in Ontario.  
30  
31 **60** The proportion female ophthalmologists increased from 18.7% to 24.1% over the study period.  
32  
33 **61** Late-career ophthalmologists (>55 years old) increased by 6.4% and compromised 45.3% of the  
34  
35 **62** workforce in 2019. Comprehensive cataract surgery was the most common area of care (yearly  
36  
37 **63** median=199). While the number of ophthalmologists/100,000 people remained stable over the  
38  
39 **64** study period (3.27 ophthalmologists/100,000 people in 2019), the number of  
40  
41 **65** ophthalmologists/100,000 people 65 years of age and older fell by 18.4%. Moderate-volume  
42  
43 **66** comprehensive cataract surgeons experienced the greatest supply reduction (-20.2%; -35.4%  
44  
45 **67** relative to the population 65 and over).  
46  
47  
48  
49

50 **68**  
51  
52 **69 Interpretation:** Between 2010 and 2019, the overall number of ophthalmologists in Ontario  
53  
54 **70** remained stable, however declines in the number of ophthalmologists per 100,000 individuals 65  
55  
56  
57  
58  
59  
60

1  
2  
3 71 years of age and older for most areas of care were evidenced. Nearly half of the ophthalmology  
4  
5 72 workforce is now over 55 years of age and female representation in the field continues to  
6  
7  
8 73 increase.

9  
10 74 **Keywords:** ophthalmology; health policy; health services research  
11

12 75  
13

14 76  
15

16 77  
17

18 78  
19

20 79  
21

22 80  
23

24 81  
25

26 82  
27

28 83  
29

30 84  
31

32 85  
33

34 86  
35

36 87  
37

38 88  
39

40 89  
41

42 90  
43

44 91  
45

46 92  
47

48 93  
49

50 94  
51

52 95  
53

54 96  
55

56 97  
57

58 98  
59

60 99

Confidential

1  
2  
3 **100 INTRODUCTION**

4 101 Ophthalmologists afford most of their care to seniors and provide 11% of all health services  
5  
6  
7 102 received by the elderly in Canada (1). Ontario, which is Canada's most populated province,  
8  
9 103 continues to have a rapidly aging population and projections indicate that individuals over 65  
10  
11 104 years old will account for 25% of the population by 2041 (2). This has prominent human  
12  
13 105 resource implications when considering that the utilization of ophthalmic services is higher  
14  
15 106 amongst older individuals who commonly present with age-related conditions such as cataracts,  
16  
17 107 glaucoma, macular degeneration and diabetic retinopathy (3-6). Technological advances have  
18  
19 108 also led to diagnostic and treatment advances which have greatly improved efficiency in the  
20  
21 109 field. To understand how these factors impact the sustainability of eye care delivery, human  
22  
23 110 resource analyses have been performed to assess for the adequacy of the current and future  
24  
25 111 supply of physicians that will serve the Canadian population (7-10).

26  
27  
28  
29  
30 112  
31  
32 113 Previous studies in Ontario have explored workforce trends in focused subspecialty areas (11-  
33  
34 114 16). However, a current and comprehensive analysis of the status of Ontario's ophthalmology  
35  
36 115 workforce is necessary to better understand human resource trends in the specialty. As such, this  
37  
38 116 paper examines the supply and demographic characteristics of Ontario's ophthalmologists from  
39  
40 117 2010 to 2019.

41  
42  
43 118

44  
45  
46 119

1  
2  
3 120 **MATERIALS AND METHODS**  
4

5 121 *Overview & Data Sources*  
6

7  
8 122 Ontario provides publicly funded healthcare to all its citizens through the Ontario Health  
9  
10 123 Insurance Plan (OHIP). Given that OHIP is the sole payer of health care services, billing data has  
11  
12 124 been validated as an accurate source of information which can capture details on all actively  
13  
14  
15 125 practicing ophthalmologists, the services they provide and the patients they see (17,18).  
16

17 126  
18  
19 127 Population-level healthcare data were obtained from the Ontario Ministry of Health and Long-  
20  
21 128 Term Care (MOH) under an agreement with the Ontario Medical Association (OMA). The OMA  
22  
23 129 and MOH had no involvement in or control over the design and conduct of the study; collection,  
24  
25  
26 130 management, analysis and interpretation of the data; preparation, review or approval of the  
27  
28 131 manuscript; and decision to submit the manuscript for publication. In this study, a population-  
29  
30 132 based analysis was conducted in Ontario from April 1st, 2010 to March 31st, 2020 (fiscal years  
31  
32 133 2010-2019, inclusive). Characterization of Ontario's ophthalmology workforce included the  
33  
34 134 evaluation of demographic characteristics including sex, career stage and overall  
35  
36  
37 135 ophthalmologist supply. Anonymized data was extracted and reported in a manner which  
38  
39 136 protected the identity of all included physicians and patients. Ontario's population estimates for  
40  
41 137 the study period were obtained from Statistics Canada (19).  
42  
43

44 138  
45

46  
47 139  
48

49 140  
50

51 141  
52

53  
54 142  
55  
56  
57  
58  
59  
60

1  
2  
3 143 ***Ophthalmologist Identification & Data Collection***  
4

5 144 To capture actively practicing ophthalmologists in Ontario, we included all physicians who use  
6  
7 145 the unique OHIP ophthalmology specialty code and submitted at least 100 billing claims per  
8  
9 146 fiscal year. Physicians were then classified into specific areas of care using the classification  
10  
11 147 criteria indicated in ‘Table 1’. Exact coding details can be found in ‘Supplementary Table 1’. We  
12  
13  
14 148 note a distinction between areas of care and subspecialty: billing information rather than  
15  
16 149 fellowship training was used to characterize an ophthalmologist’s scope of practice, given that  
17  
18 150 daily clinical services may differ considerably from the specialization of training. Billing data  
19  
20 151 has previously been used to examine the supply of ophthalmologists in various areas of care over  
21  
22 152 time (11-16); this is also referenced in ‘Table 1’. By means of a thorough, consultative process  
23  
24 153 with ophthalmologists from every subspeciality and economists from the OMA, definitions for  
25  
26 154 each area of care were created to accurately reflect the scope of practice and billing patterns from  
27  
28  
29 155 2010-2019.

30  
31  
32 156 Sex and age data were also extracted for all ophthalmologists as demographic characteristics of  
33  
34 157 each claimant were available. Ophthalmologists younger than 45 years old were considered  
35  
36 158 early-career physicians, those 45-55 years old were middle-career physicians and those older  
37  
38 159 than 55 years old were late-career physicians. The overall number of late-career  
39  
40 160 ophthalmologists were further subdivided into 4 cohorts (56-60, 61-65, 66-70 and older than 70  
41  
42 161 years old).  
43  
44  
45  
46  
47  
48  
49  
50  
51  
52  
53  
54  
55  
56  
57  
58  
59  
60

1  
2  
3 166 ***Statistical Analysis***  
4

5 167 To explore representation by sex, we investigated the proportion of female ophthalmologists in  
6  
7 168 the overall sample and across areas of care. To characterize the age of ophthalmologists, we  
8  
9 169 determined the proportions of early, middle and late-career ophthalmologists in the overall  
10  
11 170 sample and in various areas of care. The number of ophthalmologists per 100,000 people and the  
12  
13 171 number of ophthalmologists per 100,000 people 65 years of age and older were calculated within  
14  
15 172 each area of care. Growth was defined as the percentage change over the 10-year period for each  
16  
17 173 analysis. All descriptive statistics were computed and graphically represented using Microsoft  
18  
19 174 Excel ® (Microsoft Corporation, Redmond, Washington). This study included all actively  
20  
21 175 practicing ophthalmologists in Ontario, so there was no statistical testing required when  
22  
23 176 comparing cohort groups as any differences were true differences.  
24  
25  
26  
27  
28  
29

30  
31 178 ***Ethics Approval***  
32

33 179 The study's protocol was approved by University of Toronto's Research Ethics Board (Protocol  
34  
35 180 ID: 00040078), in Toronto, Ontario, Canada.  
36  
37  
38  
39

40 181

41 182

42 183

43 184 **RESULTS**

44 185 Across the study period, there was a yearly median of 464 (IQR: 447-477) actively practicing  
45  
46 186 ophthalmologists in Ontario. While the overall number of ophthalmologists/100,000 people  
47  
48 187 remained stable (2010=3.25 ophthalmologists/100,000 people, 2019=3.27  
49  
50 188 ophthalmologists/100,000 people, percentage change=+0.7%), there was a substantial decline in  
51  
52 189 the number of ophthalmologists/100,000 people 65 years of age and older (2010=23.30  
53  
54 190 ophthalmologists/100,000 people 65 years of age and older, 2019=19.00  
55  
56  
57  
58  
59  
60

1  
2  
3 191 ophthalmologists/100,000 people 65 years of age and older, percentage change=-18.4%) across  
4  
5 192 the study period.

6  
7  
8 193

9  
10 194 ***Ophthalmologist Demographic Analyses***

11  
12 195 Overall, female representation amongst Ontario's ophthalmologists increased from 18.7% to  
13  
14 196 24.1% of all ophthalmologists during the study period. Subspecialty surgeons (15.4% in 2019)  
15  
16 197 had a lower proportion of female ophthalmologists than low-volume (35.7% in 2019) and  
17  
18 198 moderate-volume comprehensive cataract surgeons (26.1% in 2019), but had a comparable  
19  
20 199 proportion to high-volume comprehensive cataract surgeons (14.6% in 2019) ('Figure 1').  
21  
22 200 Moderate-volume (+11.5%) and high-volume comprehensive cataract surgeons (+5.8%) had an  
23  
24 201 increase in representation of female ophthalmologists, while the proportion of female  
25  
26 202 subspecialty surgeons (+4.7%) and low-volume comprehensive cataract surgeons (-1.8%)  
27  
28 203 remained stable ('Table 2'). The areas of care with the least and greatest proportion of female  
29  
30 204 ophthalmologists were retina surgeons (7.5% in 2019) and paediatric ophthalmologists (48.0% in  
31  
32 205 2019), respectively.

33  
34  
35  
36  
37  
38 206

39  
40 207 Across the study period, the overall proportion of early-career ophthalmologists stayed stable  
41  
42 208 ('Figure 2'). Middle-career ophthalmologists decreased from 32.8% to 26.0% from 2010-2013  
43  
44 209 and then plateaued at this level from 2014-2019 ('Figure 3'). Late-career ophthalmologists  
45  
46 210 increased from 38.9% to 44.6% from 2010-2013, and then plateaued at this level from 2014-  
47  
48 211 2019 ('Figure 4'). In 2019, 12.2% of Ontario's ophthalmologists were 56-60 years old, 14.9%  
49  
50 212 were 61-65, 8.0% were 66-70 and 10.3% were older than 70; the proportion of ophthalmologists  
51  
52 213 who were 61-65 approximately doubled over the study period while the other late-career cohorts  
53  
54  
55  
56  
57  
58  
59  
60



1  
2  
3 214 remained comparatively stable. Furthermore, the distribution of ophthalmologists at various  
4  
5 215 career stages was variable across general medical ophthalmologists and low, moderate and high-  
6  
7 216 volume comprehensive cataract surgeons. The greatest changes over time amongst early-career  
8  
9 217 ophthalmologists were the decrease in the proportion of high-volume comprehensive cataract  
10  
11 218 surgeons (-5.5%) and the increase in proportion of low-volume comprehensive cataract surgeons  
12  
13 219 (+ 4.8%), though these absolute differences were small ('Table 3'). The greatest changes  
14  
15 220 amongst middle-career ophthalmologists were decreases in the proportion of high-volume  
16  
17 221 comprehensive cataract surgeons (-20.2%), general medical ophthalmologists (-13.1%) and  
18  
19 222 ophthalmologists practicing in subspecialty areas (-9.6%). The greatest changes amongst late-  
20  
21 223 career ophthalmologists were the increases in the proportion of high-volume comprehensive  
22  
23 224 cataract surgeons (+25.8%), general medical ophthalmologists (+11.1%) and ophthalmologists  
24  
25 225 practicing in subspecialty areas (+9.5%).  
26  
27  
28  
29  
30  
31  
32

### 33 227 ***Ophthalmologist Areas of Care***

34  
35 228 The number of ophthalmologists /100,000 people and the changes over time differed amongst the  
36  
37 229 various areas of care ('Figure 5' & 'Table 4'). Neuro-ophthalmologists (n=11 in 2019, +65.3%  
38  
39 230 over the study period), glaucoma surgeons (n=18 in 2019, +47.6%) and low vision rehabilitation  
40  
41 231 ophthalmologists (n=7 in 2019, +27.5%) experienced the greatest growth. Overall, the supply of  
42  
43 232 comprehensive cataract surgeons decreased over time (n=198 in 2019) (-8.9%). While there was  
44  
45 233 an increase in low (n=42 in 2019, +18.4%) and high-volume comprehensive cataract surgeons  
46  
47 234 (n=41 in 2019, +8.7%), moderate-volume cataract surgeons (n=115 in 2019, -20.2%)  
48  
49 235 experienced the greatest reduction in supply of any area of care.  
50  
51  
52  
53  
54  
55  
56  
57  
58  
59  
60

1  
2  
3 237 The number of ophthalmologists/100,000 people 65 years of age and older and the changes over  
4  
5 238 time also differed amongst the various areas of care ('Figure 6' & 'Table 4'). Only neuro-  
6  
7 239 ophthalmologists (+33.9%), glaucoma surgeons (+19.5%) and low vision rehabilitation  
8  
9 240 ophthalmologists (+5.4%) experienced positive growth over the study period. The three areas  
10  
11 241 with greatest reduction were moderate-volume cataract surgeons (-35.4%), general medical  
12  
13 242 ophthalmologists (n=98 in 2019, -19.6%) and retinal surgeons (n=40 in 2019, -16.6%).  
14  
15  
16  
17 243  
18  
19 244

## 20 245 **DISCUSSION**

21 246  
22  
23 247 The aim of this population-based analysis was to explore the supply and demographic  
24  
25 248 characteristics of Ontario's ophthalmology workforce over the past decade. Our study indicated  
26  
27 249 an aging ophthalmologist workforce and overall growth in female representation. The overall  
28  
29 250 number of ophthalmologists/100,000 people was stable across the study period. Several  
30  
31 251 subspecialties increased in supply over the study period, however, most subspecialties had  
32  
33 252 substantial reductions in supply when examined relative to the population 65 years of age and  
34  
35 253 older, especially for comprehensive cataract surgeons.  
36  
37  
38  
39 254

40  
41 255 The proportion of early-career ophthalmologists remained comparatively stable, middle-career  
42  
43 256 ophthalmologists decreased by 7.6% and late-career ophthalmologists increased by 6.4% over  
44  
45 257 the study period. These trends are similar to a population-based analysis which was conducted in  
46  
47 258 Ontario from 1999-2013 (20). Furthermore, amongst low-volume comprehensive cataract  
48  
49 259 surgeons, there was only growth in the proportion of early-career physicians, who now make up  
50  
51 260 most physicians in this area (54.8% in 2019). Amongst high-volume comprehensive cataract  
52  
53 261 surgeons, there was only considerable growth amongst late-career physicians, who make up  
54  
55  
56  
57  
58  
59  
60

1  
2  
3 262 nearly half of the physicians in this area (46.3% in 2019). These findings speak to the difficulties  
4  
5 263 that younger graduates face in securing equitable access to operating room time relative to their  
6  
7 264 colleagues who are later in their careers, an issue that is projected to worsen (21,22).

8  
9  
10 265 Additionally, there was considerable growth in the proportion of late-career general medical  
11  
12 266 ophthalmologists, who made up nearly 80% of all physicians in this area of care in 2019.

13  
14 267 Moreover, women continued to be underrepresented relative to their male colleagues, most  
15  
16 268 strikingly in surgical subspecialties such as retinal surgery (7.5%), which aligns with a recent  
17  
18 269 national study (23). We found that the greater the surgical volume amongst comprehensive  
19  
20 270 cataract surgeons, the less women were represented. This gender gap has been similarly  
21  
22 271 highlighted in previous research (24).  
23  
24  
25

26 272  
27  
28 273 Although the number of ophthalmologists/100,000 people in 2019 (3.27) seems adequate given  
29  
30 274 the proposed ideal ratio of 3.37 indicated by The Royal College of Physicians and Surgeons of  
31  
32 275 Canada (RCPSC) in 1988, this suggestion was made decades ago on the assumption of a vastly  
33  
34 276 different demographic mix, which did not consider the current realities of our rapidly aging  
35  
36 277 population as well as the large technological advances in therapeutics and scope of practice of  
37  
38 278 ophthalmologists and optometrists (25). For instance, the refinement of phacoemulsification,  
39  
40 279 micro-invasive glaucoma surgery (MIGS), lamellar keratoplasty, intravitreal anti-vascular  
41  
42 280 endothelial growth factor injections and other procedures have allowed for increased clinic  
43  
44 281 efficiency. Nonetheless, it is projected that there will be 14.8 ophthalmologists/100,000 people  
45  
46 282 65 years of age and older in 2030, a further decrease of 22.1% in ophthalmologist supply relative  
47  
48 283 to our study's 2019 measure (10). This is in the context of underlying population demographic  
49  
50  
51  
52  
53  
54  
55  
56  
57  
58  
59  
60

1  
2  
3 284 trends, with 62% of ophthalmic services directed towards seniors and a third of the population  
4  
5 285 over the age of 65 that have visually threatening conditions (1,26).  
6  
7  
8 286  
9  
10 287 Although neuro-ophthalmologists, glaucoma surgeons and low vision rehabilitation  
11  
12 288 ophthalmologists had the most notable increases in supply, these were also subspecialties with  
13  
14 289 the smallest baseline proportion of ophthalmologists and the analyses was therefore sensitive to  
15  
16  
17 290 small changes in supply. The growth in some of these areas was also likely confounded. For  
18  
19 291 example, the consult code A231 which was used to capture neuro-ophthalmologists was  
20  
21  
22 292 introduced mid-way into the 2010 fiscal year and their growth could partly be explained by the  
23  
24 293 uptake of this code's use into practice early in the study period rather than an actual increase in  
25  
26 294 physicians (27). This hypothesis is supported by our data, which showed that the average growth  
27  
28 295 in the number of neuro-ophthalmologists year-to-year from 2011-2013 was 22.6% compared to  
29  
30 296 the average of 3.5% for the remainder of the study period. To maintain consistency in  
31  
32  
33 297 definitions, this study also only considered ophthalmology residency-trained neuro-  
34  
35 298 ophthalmologists and not neurology residency-trained neuro-ophthalmologists, which would  
36  
37 299 impact the overall proportion, supply and growth values for this subspecialty. Moreover, while  
38  
39  
40 300 the supply of glaucoma surgeons remained stable from 2010-2016, the growth from 2017-2019  
41  
42 301 was likely inflated because of the increased number of general surgical ophthalmologists  
43  
44 302 performing MIGS. There is currently no specific MIGS billing code in Ontario; as such,  
45  
46  
47 303 surgeons could submit combinations of existing glaucoma filtering surgery codes to be  
48  
49 304 reimbursed for this service (28). There was growth of low vision rehabilitation ophthalmologists  
50  
51 305 over the study period, likely secondary to increasing interest of graduates and demand for this  
52  
53  
54 306 emerging subspecialty within ophthalmology (29).  
55  
56  
57  
58  
59  
60

1  
2  
3 3074  
5 308 ***Limitations***

6  
7  
8 309 A limitation of using billing data to characterize ophthalmologists is the mis-categorization of  
9  
10 310 comprehensive ophthalmologists in subspecialty categories if they have a focused scope of  
11  
12 311 practice in a limited number of areas of care. However, the intention of our analysis was to  
13  
14 312 evaluate providers of care and not training, and as a result, this limitation would not affect the  
15  
16 313 interpretation. Additionally, some category definitions were not mutually exclusive, and it was  
17  
18 314 possible for an ophthalmologist to be categorized as both an oculoplastic surgeon and neuro-  
19  
20 315 ophthalmologist for example if they met the criteria for both subspecialties. To address these  
21  
22 316 limitations, we used conservative thresholds for the minimum number of performed services to  
23  
24 317 mitigate any billing errors and ensure appropriate inclusion of ophthalmologists in certain areas  
25  
26 318 of care. For example, one Ontario study defined retina medical ophthalmologists as those who  
27  
28 319 conducted greater than equal to 100 photocoagulation therapies and intravitreal injections (13);  
29  
30 320 we increased this threshold of minimum injections to 300 to best ensure general  
31  
32 321 ophthalmologists were not captured in our definition. Additionally, for paediatric  
33  
34 322 ophthalmology, we chose a high-volume threshold of strabismus surgery which was referenced  
35  
36 323 in the literature as part of our definition (14). Furthermore, classifying the career stage of  
37  
38 324 ophthalmologists using age did not consider the possible early and late entry of physicians into  
39  
40 325 ophthalmology. Unfortunately, the year of medical school graduation was not an available  
41  
42 326 parameter.

43  
44 32745  
46 32847  
48 329

1  
2  
3 330 **CONCLUSIONS**  
4

5 331 In conclusion, there was an overall decline in the supply of comprehensive cataract surgeons  
6  
7 332 over the study period. When standardized to the population 65 years old and over, there were  
8  
9 333 substantial supply reductions in most areas of care. An aging ophthalmology workforce was  
10  
11 334 observed over the study period, which is expected to continue. Gender gaps in the provision of  
12  
13 335 subspeciality and high-volume surgical care were evident, as was the trend that early-career  
14  
15 336 ophthalmologists had lower surgical volumes relative to late-career peers. Notably, these  
16  
17 337 findings compromise only one critical component amongst a multitude of others that influence  
18  
19 338 the current and future sustainability of eye care delivery in the province.  
20  
21  
22  
23

24 339  
25  
26 340 Future research is needed to better contextualize study findings and allow for a more  
27  
28 341 comprehensive interpretation of data. The currently recommended ideal ratio of  
29  
30 342 ophthalmologists/100,000 people is outdated and a more modern, evidence-based value is  
31  
32 343 unknown. Future work should aim to update this metric to allow for more accurate assessments  
33  
34 344 of human resource adequacy. The extent to which supply reductions have been compensated by  
35  
36 345 increased clinical efficiency (e.g. increased patient and procedural volume) afforded by medical  
37  
38 346 and technological innovations remains unclear. Scope of practice changes should also be further  
39  
40 347 characterized given a paucity of data. Additionally, the current and future role of optometry in  
41  
42 348 the co-delivery of Ontario's eye services was beyond the scope of our research question, but an  
43  
44 349 important consideration when developing policy for future human resource requirements.  
45  
46  
47  
48

49 350

50  
51 351

52  
53 352  
54  
55  
56  
57  
58  
59  
60

353

354

355

356

## REFERENCES

1. Slade S, Shrichand A, DiMillo, S (2019) *Health care for an aging population: a study of how physicians care for seniors in Canada*. (The Royal College of Physicians and Surgeons of Canada, Ontario, Ottawa). Available: <https://www.royalcollege.ca/rcsite/health-policy/senior-care-e>. accessed 2021 May 16.
2. (November 2017) *Aging with confidence: Ontario's action plan for seniors*. (Government of Ontario, Ontario, Ottawa). Available: <https://www.ontario.ca/page/aging-confidence-ontario-action-plan-seniors>. accessed 2021 May 16.
3. Hatch WV, Campbell EDL, Bell CM, et al. (2012) Projecting the Growth of Cataract Surgery During the Next 25 Years. *Arch Ophthalmol* 130:1479–81. doi:10.1001/archophthalmol.2012.838
4. Tuck MW, Crick RP (2003) The projected increase in glaucoma due to an ageing population. *Ophthalmic Physiol Opt* 23:175-9. doi:10.1046/j.1475-1313.2003.00104
5. Zheng Y, He M, Congdon N (2012) The worldwide epidemic of diabetic retinopathy. *Indian J Ophthalmol* 60:428-31. doi:10.4103/0301-4738.100542
6. Wong WL, Su X, Li X, et al. (2014) Global prevalence of age-related macular degeneration and disease burden projection for 2020 and 2040: a systematic review and meta-analysis. *Lancet Glob Health* 2:e106-16. doi:10.1016/S2214-109X(13)70145-1
7. Valberg JD (1989) Manpower Study Four implies future supply and demand for ophthalmologists is balanced. *Can J Ophthalmol* 24:286-91.
8. Pratt AW (2000) The pig and the python come to ophthalmology. *Perspectives—The Newsletter of the Canadian Ophthalmological Society*
9. Bellan L, Buske L (2007) Ophthalmology human resource projections: are we heading for a crisis in the next 15 years? *Can J Ophthalmol* 42:34-8.
10. Bellan L, Buske L, Wang S, et al. (2013) The landscape of ophthalmologists in Canada: present and future. *Can J Ophthalmol* 48:160-6
11. Campbell RJ, Ten Hove MW, Bell CM, et al. (2020) Exclusive cataract surgical focus among ophthalmologists: a population-based analysis. *Can J Ophthalmol* 55:359-65. doi:10.1016/j.jcjo.2020.05.003.
12. Campbell RJ, Bell CM, Gill SS, et al. Subspecialization in glaucoma surgery. (2012) *Ophthalmology* 119:2270-3. doi:10.1016/j.ophtha.2012.05.043.
13. Micieli JA, Micieli A, Schlenker MB, et al. (2014) Growth of medical and surgical vitreoretinal subspecialization in Ontario over 12 years. *Can J Ophthalmol* 49:312-9. doi:10.1016/j.jcjo.2014.02.010
14. Szigiato AA, Caldwell M, Buys YM, et al. (2017) Trends in pediatric strabismus surgery in the new millennium: influence of funding and perceived benefits of surgery. *Can J Ophthalmol* 52:243-9. doi:10.1016/j.jcjo.2016.11.014

- 1  
2  
3 394 15. Campbell RJ, Gill S, Ten Hove M, et al. (2015) Strabismus surgical subspecialization: a  
4 395 population-based analysis. *JAMA Ophthalmol.* 133:555-9.  
5 396 16. Basilious A, Basilious A, Mao A, et al. (2019) Trends in low vision care provided by  
6 397 ophthalmologists in Ontario between 2009 and 2015. *Can J Ophthalmol* 54:229-36.  
7 398 doi:10.1016/j.jcjo.2018.04.024  
8 399 17. (Updated 2021 Oct. 21) *What OHIP covers* (Government of Ontario, Ontario, Ottawa)  
9 400 Available: <https://www.ontario.ca/page/what-ohip-covers>. accessed 2021 Nov. 14.  
10 401 18. Williams JI, Young W (1996) A summary of studies on the quality of health care  
11 402 administrative databases in Canada. In: Goel V, Williams JI, Anderson GM, Blackstien-  
12 403 Hirsch P, Fooks C, Maylor CD, eds. *Patterns of Health Care in Ontario. The ICES*  
13 404 *Practice Atlas. 2nd ed.* Ottawa, Ont.: Canadian Medical Association; p. 339-45.  
14 405 19. Statistics Canada (Updated 2021 May 16). *Estimates of population (2016 Census and*  
15 406 *administrative data), by age group and sex for July 1st, Canada, provinces, territories,*  
16 407 *health regions (2018 boundaries) and peer groups*, Table 17-10-0134-01. (Government  
17 408 of Canada, Ontario, Ottawa)  
18 409 Available: <https://www150.statcan.gc.ca/t1/tbl1/en/tv.action?pid=1710013401>. accessed  
19 410 2021 May 16.  
20 411 20. Micieli JA, Buys YM (2016) Proportion of medical-only versus surgical ophthalmology  
21 412 practices: associations and trends. *Can J Ophthalmol* 51:161-7.  
22 413 doi:10.1016/j.jcjo.2016.04.005  
23 414 21. The Provincial Vision Task Force (2013) *A vision for Ontario: strategic*  
24 415 *recommendations for ophthalmology in Ontario — the Provincial Vision Strategy Task*  
25 416 *Force.* (Ontario Ministry of Health and Long-Term Care, Ontario,  
26 417 Ottawa). Available: <https://collections.ola.org/mon/27011/325059.pdf>. accessed 2021  
27 418 May 16.  
28 419 22. Campbell RJ, El-Defrawy SR, Bell CM, et al. (2017) Effect of cataract surgery volume  
29 420 constraints on recently graduated ophthalmologists: a population-based cohort  
30 421 study. *CMAJ* 189:e424-430. doi:10.1503/cmaj.150674  
31 422 23. Tanya SM, He B, Tang J, et al. (April 15, 2021) Research productivity and impact of  
32 423 Canadian academic ophthalmologists: trends in H-index, sex, subspecialty, and faculty  
33 424 appointment. *Can J Ophthalmol* S0008-4182(21)00123-X.  
34 425 doi:10.1016/j.jcjo.2021.03.011. [Epub ahead of print]  
35 426 24. Micieli JA, Trope GE, Buys YM (2016) Gender gap and declining surgical activity  
36 427 among new graduates: cataract surgery in Ontario. *Can J Ophthalmol.* 2016;51:154-160.  
37 428 doi:10.1016/j.jcjo.2016.04.013  
38 429 25. Royal College of Physicians and Surgeons of Canada. (1988) *National Specialty*  
39 430 *Physician Review* (Royal College of Physicians and Surgeons of Canada, Ontario,  
40 431 Ottawa)  
41 432 26. Noertjojo K, Maberley D, Bassett K, et al. (2006) Awareness of eye diseases and risk  
42 433 factors: identifying needs for health education and promotion in Canada. *Can J*  
43 434 *Ophthalmol* 41:617-23. doi:10.1016/S0008-4182(06)80035-9  
44 435 27. (Updated 2010 Oct. 1) *OHIP Bulletins, Bulletin 4520 Implementation of the 2008*  
45 436 *Physician Services Agreement – Changes Effective October 1, 2010, Chart 4*  
46 437 *REVISED* (Government of Ontario Ministry of Health and Long-Term Care).  
47 438 Available: [https://www.health.gov.on.ca/en/pro/programs/ohip/bulletins/4000/bulletin\\_40](https://www.health.gov.on.ca/en/pro/programs/ohip/bulletins/4000/bulletin_4000_mn.aspx)  
48 439 [00\\_mn.aspx](https://www.health.gov.on.ca/en/pro/programs/ohip/bulletins/4000/bulletin_4000_mn.aspx). accessed 2021 May 16.  
49  
50  
51  
52  
53  
54  
55  
56  
57  
58  
59  
60



1  
2  
3 440 28. Ontario Health (Quality) (2019) Minimally Invasive Glaucoma Surgery: A Budget  
4 441 Impact Analysis and Evaluation of Patients' Experiences, Preferences, and Values. *Ont*  
5 442 *Health Technol Assess Ser* 19:1-57.  
6 443  
7 444 29. Markowitz SN (2008) Ontario recognizes low-vision rehabilitation. *Can J*  
8 444 *Ophthalmol* 43:398-9. doi:10.3129/i08-086  
9 445

10  
11  
12  
13  
14  
15  
16  
17  
18  
19  
20  
21  
22  
23  
24  
25  
26  
27  
28  
29  
30  
31  
32  
33  
34  
35  
36  
37  
38  
39  
40  
41  
42  
43  
44  
45  
46  
47  
48  
49  
50  
51  
52  
53  
54  
55  
56  
57  
58  
59  
60

Confidential

1  
2  
3  
4  
5  
6  
7  
8  
9  
10  
11  
12  
13  
14  
15  
16  
17  
18  
19  
20  
21  
22  
23  
24  
25  
26  
27  
28  
29  
30  
31  
32  
33  
34  
35  
36  
37  
38  
39  
40  
41  
42  
43  
44  
45  
46  
47

| Areas of Care                  | This Study's Classification Criteria                                                                                      | Criteria in Literature                                                                                                                                                                                                                                                                                                                                                                                                                                          |
|--------------------------------|---------------------------------------------------------------------------------------------------------------------------|-----------------------------------------------------------------------------------------------------------------------------------------------------------------------------------------------------------------------------------------------------------------------------------------------------------------------------------------------------------------------------------------------------------------------------------------------------------------|
| Neuro-ophthalmologist          | ≥50 neuro-ophthalmology consultations                                                                                     | N/A                                                                                                                                                                                                                                                                                                                                                                                                                                                             |
| Corneal surgeon                | ≥10 corneal transplants (any combination of penetrating, lamellar limbal or stem cell)                                    | Significant volume: ≥50 corneal transplants (any combination of penetrating or lamellar limbal) (11)                                                                                                                                                                                                                                                                                                                                                            |
| Glaucoma surgeon               | ≥50 glaucoma filtering procedures (no combination procedure)                                                              | <p>Significant volume: ≥50 glaucoma filtering procedures (glaucoma filtering and combination cataract extraction/glaucoma filtering) and bleb repair procedures (11)</p> <p>Higher volume: ≥ 100 glaucoma filtering procedures (glaucoma filtering and combination cataract extraction/glaucoma filtering) (12)</p> <p>Lower volume: &lt;100 glaucoma filtering procedures (glaucoma filtering and combination cataract extraction/glaucoma filtering) (12)</p> |
| Retina medical ophthalmologist | ≥300 intravitreal injections AND ≥100 laser photocoagulation procedures, excluding those who conducted any retina surgery | High/low volume not specified: ≥100 intravitreal injections AND ≥100 laser photocoagulation procedures (13)                                                                                                                                                                                                                                                                                                                                                     |
| Retinal surgeon                | ≥15 of any combination of vitrectomies or scleral buckle procedures                                                       | <p>Significant volume: ≥ 50 any combination of vitrectomy or scleral buckle procedures (11)</p> <p>High/low volume not specified: ≥5 PRMP or segmentation including PPV (13)</p>                                                                                                                                                                                                                                                                                |

1  
2  
3  
4  
5  
6  
7  
8  
9  
10  
11  
12  
13  
14  
15  
16  
17  
18  
19  
20  
21  
22  
23  
24  
25  
26  
27  
28  
29  
30  
31  
32  
33  
34  
35  
36  
37  
38  
39  
40  
41  
42  
43  
44  
45  
46  
47

|                                                |                                                                                                                                                                                                                                                                                                    |                                                                                                                                                                     |
|------------------------------------------------|----------------------------------------------------------------------------------------------------------------------------------------------------------------------------------------------------------------------------------------------------------------------------------------------------|---------------------------------------------------------------------------------------------------------------------------------------------------------------------|
| Oculoplastic surgeon                           | ≥20 of any combination of tumor or foreign body excisions/biopsies/lateral orbitotomies, orbital decompressions, dermis fat grafts, fornix reconstructions, free mucous membrane grafts, dacryocystectomies, lacerated canaliculus repairs, dacryocystorhinostomies and lacrimal bypass procedures | N/A                                                                                                                                                                 |
| Pediatric ophthalmologist**                    | ≥50 pediatric strabismus surgeries OR ≥50% of all consults conducted on pediatric patients AND does not meet the criteria of any of the above categories                                                                                                                                           | Significant volume: ≥50 strabismus surgeries *** (11)<br>High volume: ≥50 pediatric strabismus surgeries *** (14)<br>High volume: ≥30 strabismus surgeries *** (15) |
| Low vision rehabilitation ophthalmologist      | ≥50 of any combination of initial or follow-up low vision rehabilitation assessments AND does not meet the criteria of any of the above categories                                                                                                                                                 | High volume/low volume not specified: ≥1 of initial or follow-up low vision rehabilitation assessments (16)                                                         |
| Low-volume comprehensive cataract surgeon      | ≥1 but <200 cataract surgeries AND does not meet the criteria of any of the above categories                                                                                                                                                                                                       | N/A                                                                                                                                                                 |
| Moderate-volume comprehensive cataract surgeon | 200-800 cataract surgeries AND does not meet the criteria of any of the above categories                                                                                                                                                                                                           | N/A                                                                                                                                                                 |
| High-volume comprehensive cataract surgeon     | >800 cataract surgeries AND does not meet the criteria of any of the above categories                                                                                                                                                                                                              | N/A                                                                                                                                                                 |

1  
2  
3  
4  
5  
6  
7  
8  
9  
10  
11  
12  
13  
14  
15  
16  
17  
18  
19  
20  
21  
22  
23  
24  
25  
26  
27  
28  
29  
30  
31  
32  
33  
34  
35  
36  
37  
38  
39  
40  
41  
42  
43  
44  
45  
46  
47

|                                 |                                                                                                                                                                            |     |
|---------------------------------|----------------------------------------------------------------------------------------------------------------------------------------------------------------------------|-----|
| General medical ophthalmologist | ≥100 of any combination of ophthalmic consultations or assessments AND does not perform ophthalmic surgeries AND does not meet the criteria of any of the above categories | N/A |
|---------------------------------|----------------------------------------------------------------------------------------------------------------------------------------------------------------------------|-----|

**Table 1: Classification criteria for the inclusion of ophthalmologists to an area of care in each fiscal year for 2010-2019 fiscal years, inclusive**

\*All fee-for-service (FFS) and shadow billing professional claims were considered to capture ophthalmologists under different payment plans

\*\* Pediatric population considered patients younger than 18 years old

\*\*\* These literature definitions characterized strabismus surgeons only, not pediatric ophthalmologists which could also be medical-only

≥ means “Greater than or equal to”

Confidential

| Area of Care                                    | Change in the proportion of female ophthalmologists from 2010-2019 fiscal years |
|-------------------------------------------------|---------------------------------------------------------------------------------|
| Overall                                         | +5.4%                                                                           |
| General Medical Ophthalmologists                | -2.5%                                                                           |
| Low-Volume Comprehensive Cataract Surgeons      | -1.8%                                                                           |
| Subspecialty Surgeons                           | +4.7%                                                                           |
| High-Volume Comprehensive Cataract Surgeons     | +5.8%                                                                           |
| Moderate-Volume Comprehensive Cataract Surgeons | +11.5%                                                                          |

**Table 2:** Change in the proportion of female ophthalmologists practicing overall, in subspecialty surgical areas, general medical and comprehensive surgical areas of care from 2010-2019 fiscal years, inclusive

Confidential

| Area of Care                                    | Percentage change in the proportion of early-career ophthalmologists from 2010-2019 fiscal years | Percentage change in the proportion of middle-career ophthalmologists from 2010-2019 years | Percentage change in the proportion of late-career ophthalmologists from 2010-2019 years |
|-------------------------------------------------|--------------------------------------------------------------------------------------------------|--------------------------------------------------------------------------------------------|------------------------------------------------------------------------------------------|
| Overall                                         | +1.2%                                                                                            | -7.6%                                                                                      | +6.4%                                                                                    |
| General Medical Ophthalmologists                | +2.0%                                                                                            | -13.1%                                                                                     | +11.1%                                                                                   |
| Subspecialty Ophthalmologists                   | -1.2%                                                                                            | -9.6%                                                                                      | +9.5%                                                                                    |
| Low-Volume Comprehensive Cataract Surgeons      | +4.8%                                                                                            | -3.7%                                                                                      | -1.0%                                                                                    |
| Moderate-Volume Comprehensive Cataract Surgeons | +0.8%                                                                                            | +1.8%                                                                                      | -2.6%                                                                                    |
| High-Volume Comprehensive Cataract Surgeons     | -5.5%                                                                                            | -20.2%                                                                                     | +25.8%                                                                                   |

**Table 3:** Change in the proportion of early, middle and late-career ophthalmologists practicing overall, in subspecialty areas, general medical and comprehensive surgical areas of care from 2010-2019 fiscal years, inclusive

1  
2  
3  
4  
5  
6  
7  
8  
9  
10  
11  
12  
13  
14  
15  
16  
17  
18  
19  
20  
21  
22  
23  
24  
25  
26  
27  
28  
29  
30  
31  
32  
33  
34  
35  
36  
37  
38  
39  
40  
41  
42  
43  
44  
45  
46  
47

| Area of Care                                    | Number of ophthalmologists/100,000 people in 2010 | Percentage change in the number of ophthalmologists/100,000 people from 2010-2019 fiscal years | Number of ophthalmologists/100,000 people 65 years of age and older in 2010 | Percentage change in number of ophthalmologists/100,000 people 65 years of age and older from 2010-2019 fiscal years |
|-------------------------------------------------|---------------------------------------------------|------------------------------------------------------------------------------------------------|-----------------------------------------------------------------------------|----------------------------------------------------------------------------------------------------------------------|
| All Comprehensive Cataract Surgeons             | 1.49                                              | -8.9%                                                                                          | 10.69                                                                       | -26.2%                                                                                                               |
| Low-Volume Comprehensive Cataract Surgeons      | 0.24                                              | +18.4%                                                                                         | 1.75                                                                        | -4.2%                                                                                                                |
| Moderate-Volume Comprehensive Cataract Surgeons | 0.99                                              | -20.2%                                                                                         | 7.09                                                                        | -35.4%                                                                                                               |
| High-Volume Comprehensive Cataract Surgeons     | 0.26                                              | +8.7%                                                                                          | 1.86                                                                        | -12.0%                                                                                                               |
| General Medical Ophthalmologists                | 0.68                                              | -0.7%                                                                                          | 4.86                                                                        | -19.6%                                                                                                               |
| Retinal Surgeons                                | 0.27                                              | +3.1%                                                                                          | 1.91                                                                        | -16.6%                                                                                                               |
| Corneal Surgeons                                | 0.16                                              | +5.4%                                                                                          | 1.15                                                                        | -13.1%                                                                                                               |
| Paediatric Ophthalmologists                     | 0.16                                              | +7.4%                                                                                          | **                                                                          | **                                                                                                                   |
| Retina Medical Ophthalmologists                 | 0.18                                              | +9.8%                                                                                          | 1.25                                                                        | -11.1%                                                                                                               |
| Oculoplastic Surgeons                           | 0.13                                              | +11.4%                                                                                         | 0.93                                                                        | -9.8%                                                                                                                |
| Low Vision Rehabilitation Ophthalmologists      | *                                                 | +27.5%                                                                                         | *                                                                           | +5.4%                                                                                                                |
| Glaucoma Surgeons                               | 0.08                                              | +47.6%                                                                                         | 0.60                                                                        | +19.5%                                                                                                               |
| Neuro-Ophthalmologists                          | 0.05                                              | +65.3%                                                                                         | 0.33                                                                        | +33.9%                                                                                                               |

**Table 4:** Number of ophthalmologists/100,000 people in the 2010 fiscal year and change from 2010-2019 fiscal years in each area of care (overall population and population 65 years of age and older)

\*the number of low vision rehabilitation ophthalmologists for the 2010 fiscal year was <5 and cannot be reported for privacy reasons. Percentage change in this area of care is from 2011 to 2019

\*\*Given the nature of the analysis, the change in the number of paediatric ophthalmologists/100,000 people 65 years of age and older was not calculated.

1  
2  
3  
4  
5  
6  
7  
8  
9  
10  
11  
12  
13  
14  
15  
16  
17  
18  
19  
20  
21  
22  
23  
24  
25  
26  
27  
28  
29  
30  
31  
32  
33  
34  
35  
36  
37  
38  
39  
40  
41  
42  
43  
44  
45  
46  
47

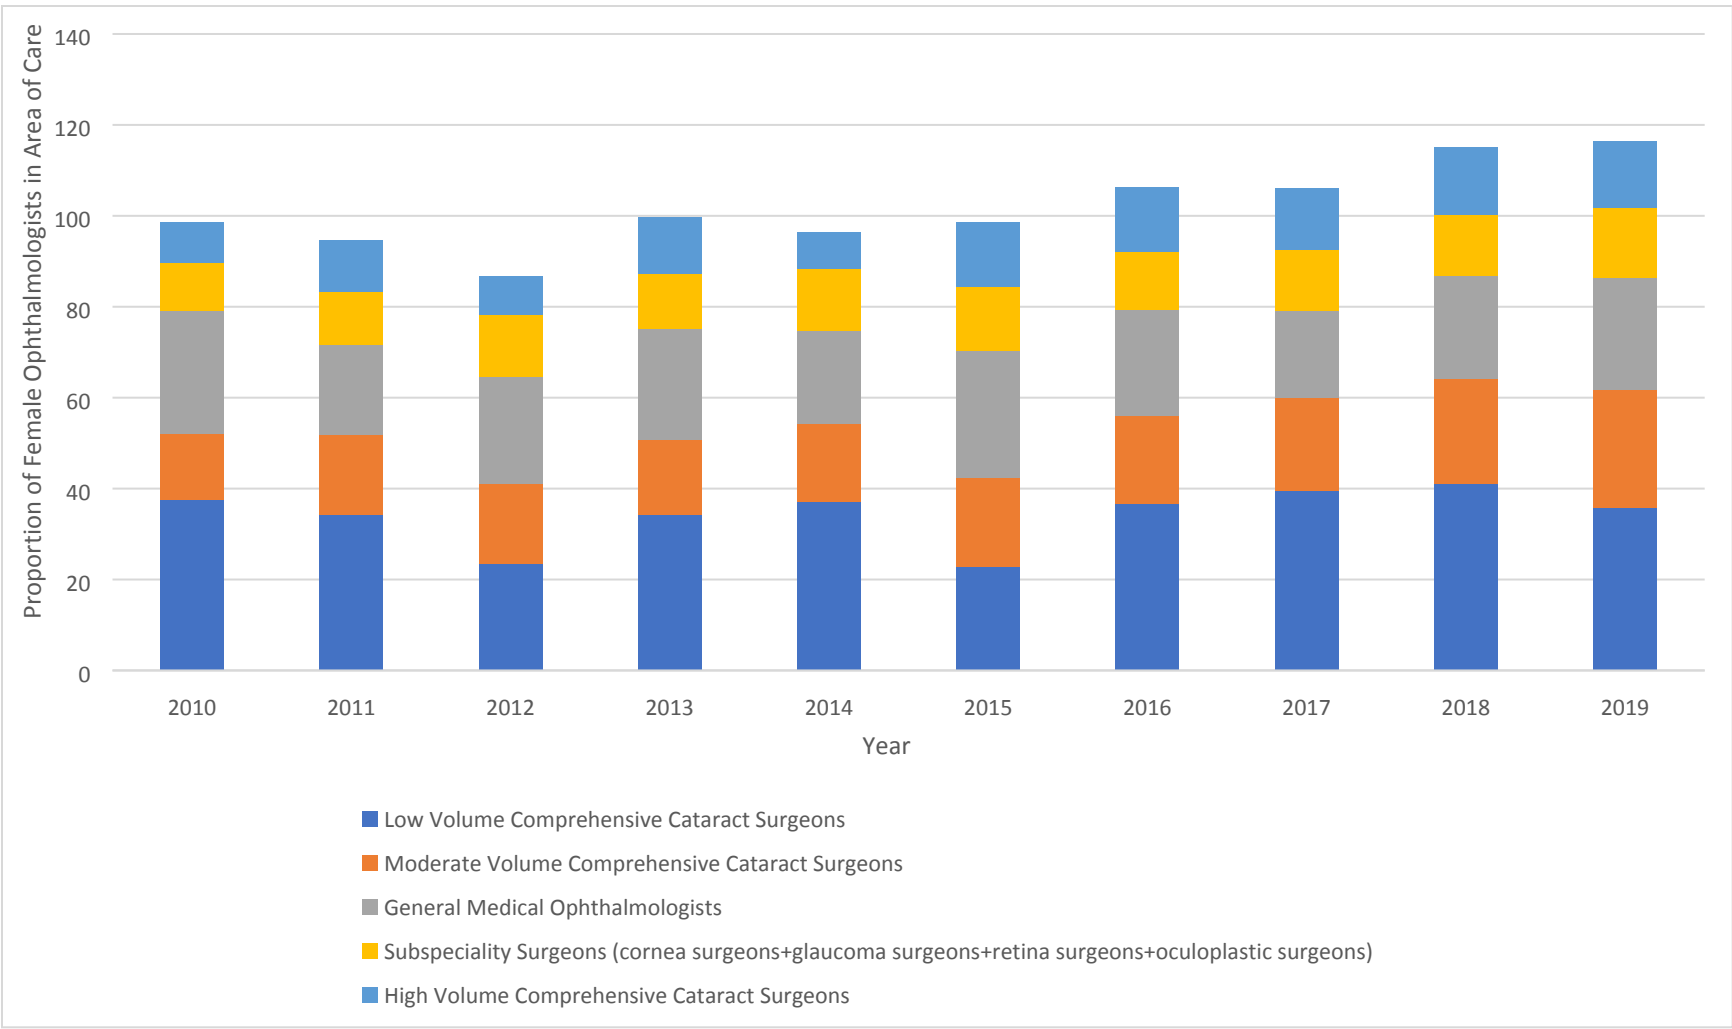

**Figure 1:** Trends in the proportion of female ophthalmologists practicing in subspecialty surgical areas, general medical and comprehensive surgical areas of care from 2010-2019 fiscal years, inclusive  
 \*Paediatric ophthalmology was not considered as a surgical subspecialty because non-surgical paediatric ophthalmologists were also included in this cohort



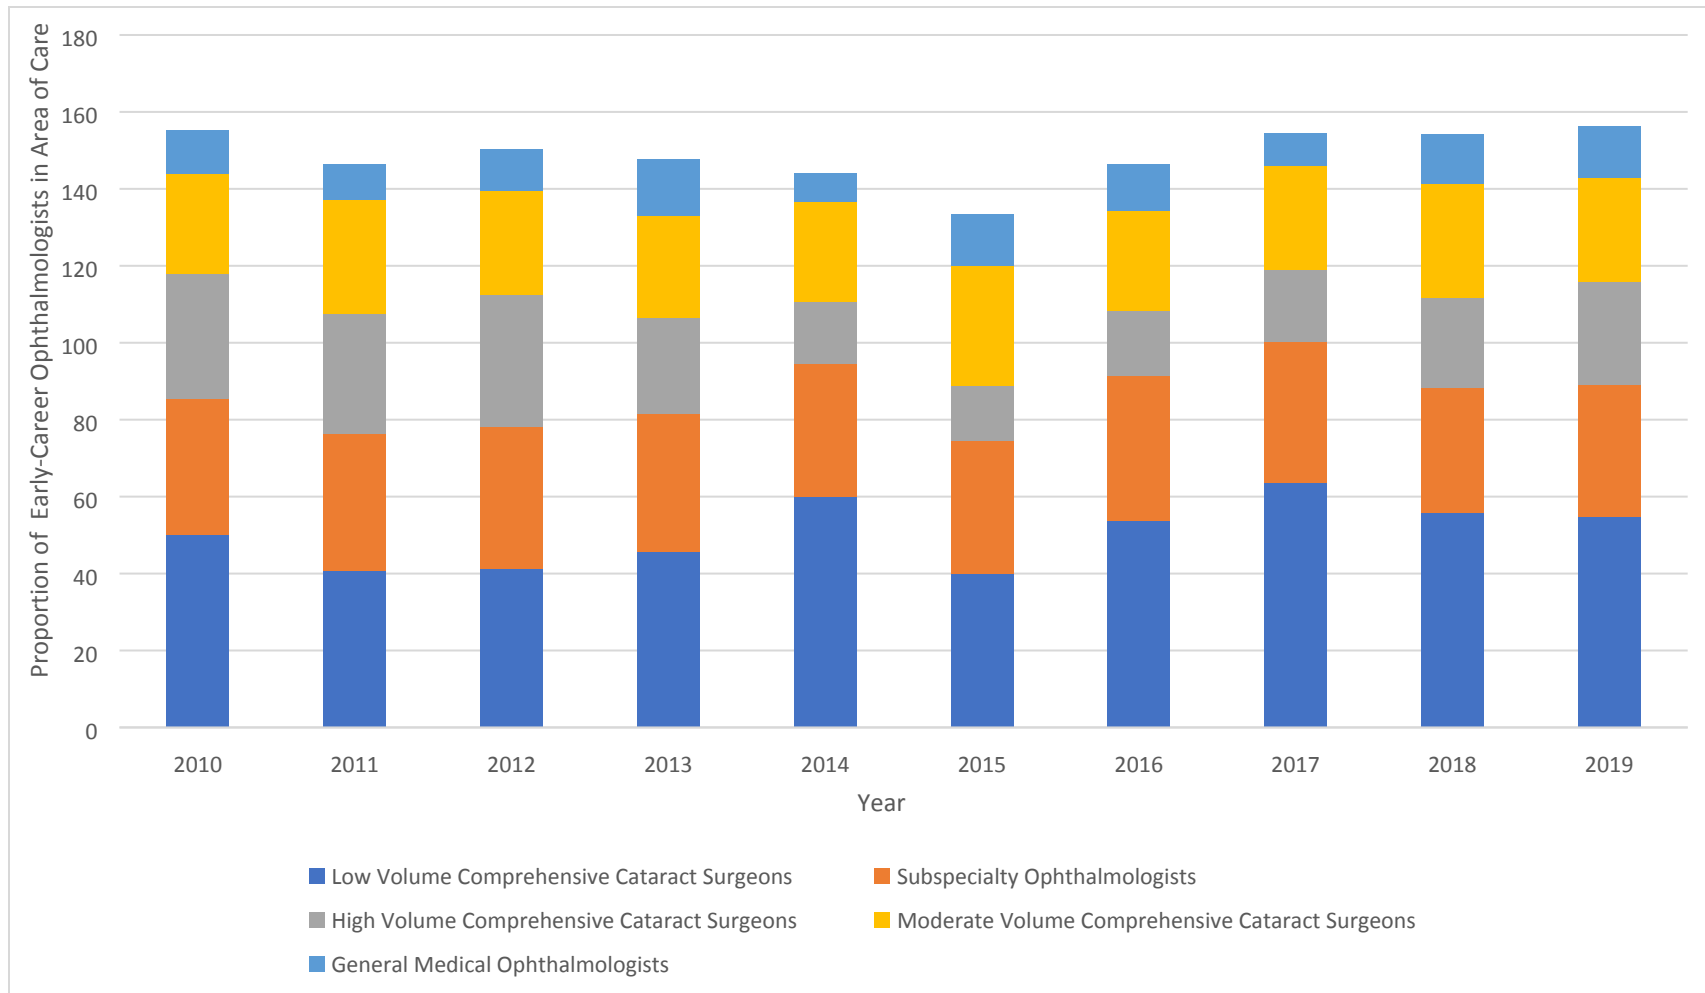

**Figure 2:** Trends in the proportion of early-career ophthalmologists practicing in subspecialty areas, general medical and comprehensive surgical areas of care from 2010-2019 fiscal years, inclusive

1  
2  
3  
4  
5  
6  
7  
8  
9  
10  
11  
12  
13  
14  
15  
16  
17  
18  
19  
20  
21  
22  
23  
24  
25  
26  
27  
28  
29  
30  
31  
32  
33  
34  
35  
36  
37  
38  
39  
40  
41  
42  
43  
44  
45  
46  
47

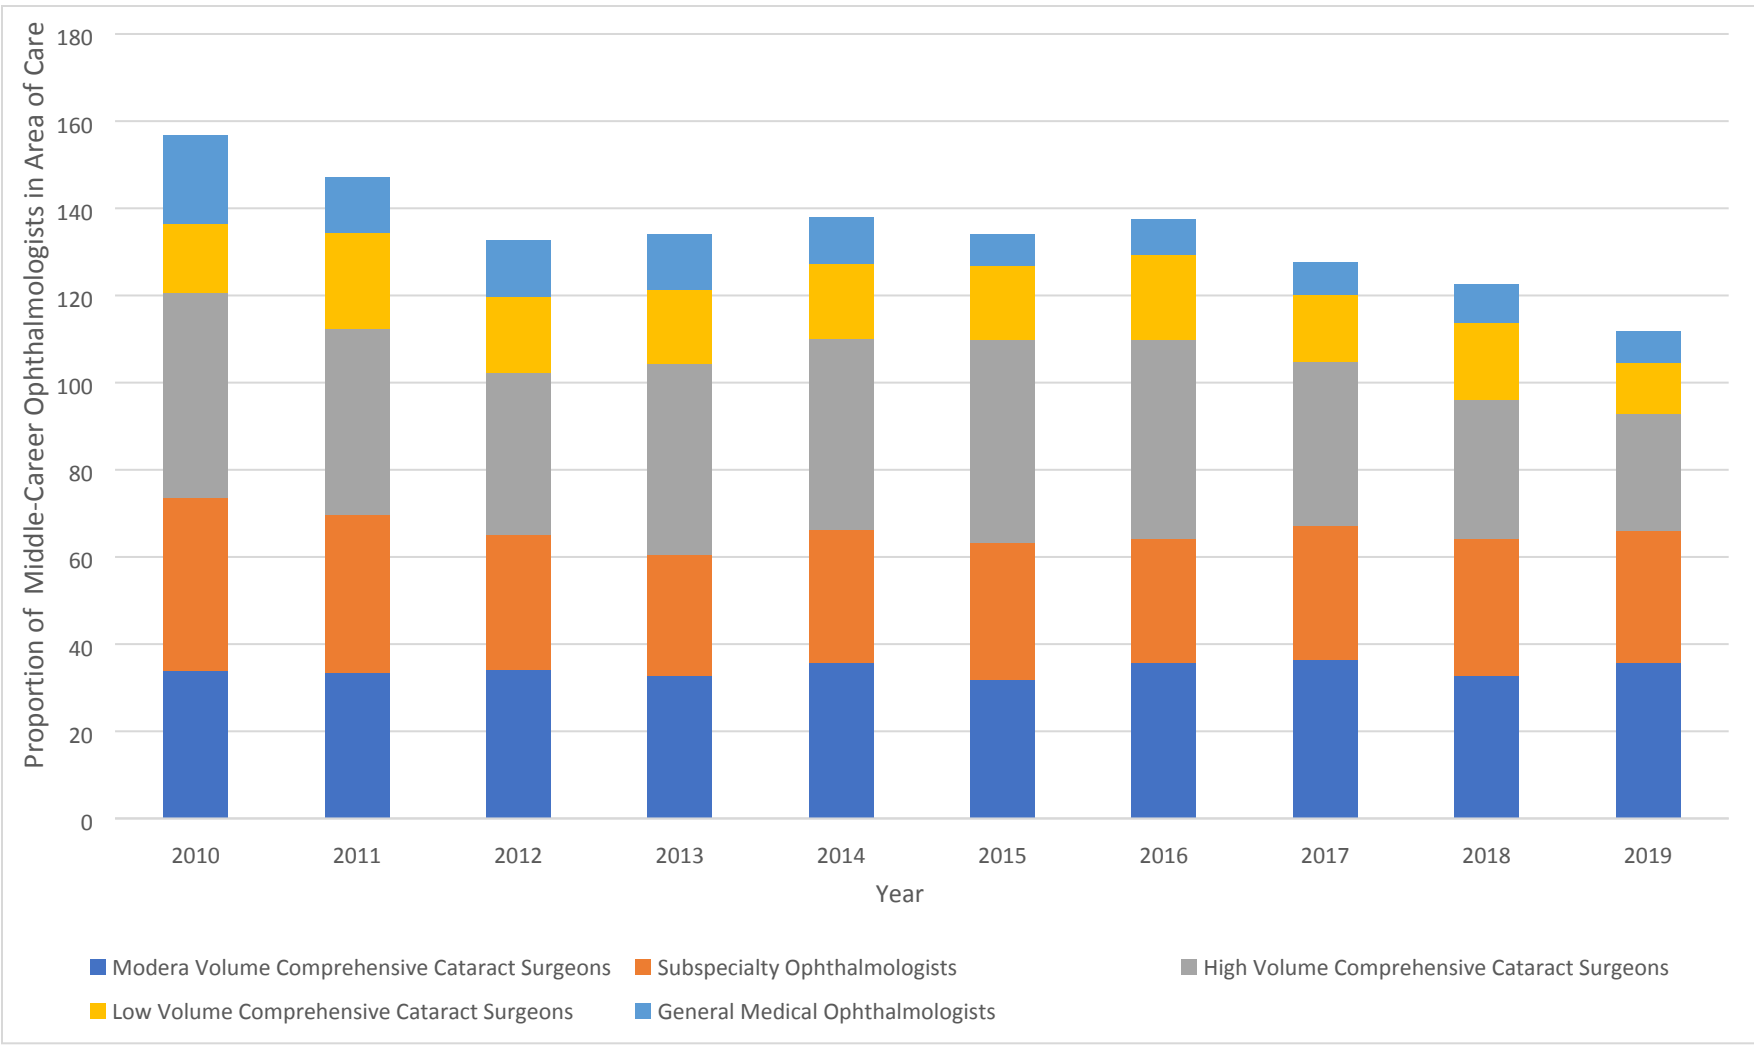

**Figure 3:** Trends in the proportion of middle-career ophthalmologists practicing in subspecialty areas, general medical and comprehensive surgical areas of care from 2010-2019 fiscal years, inclusive

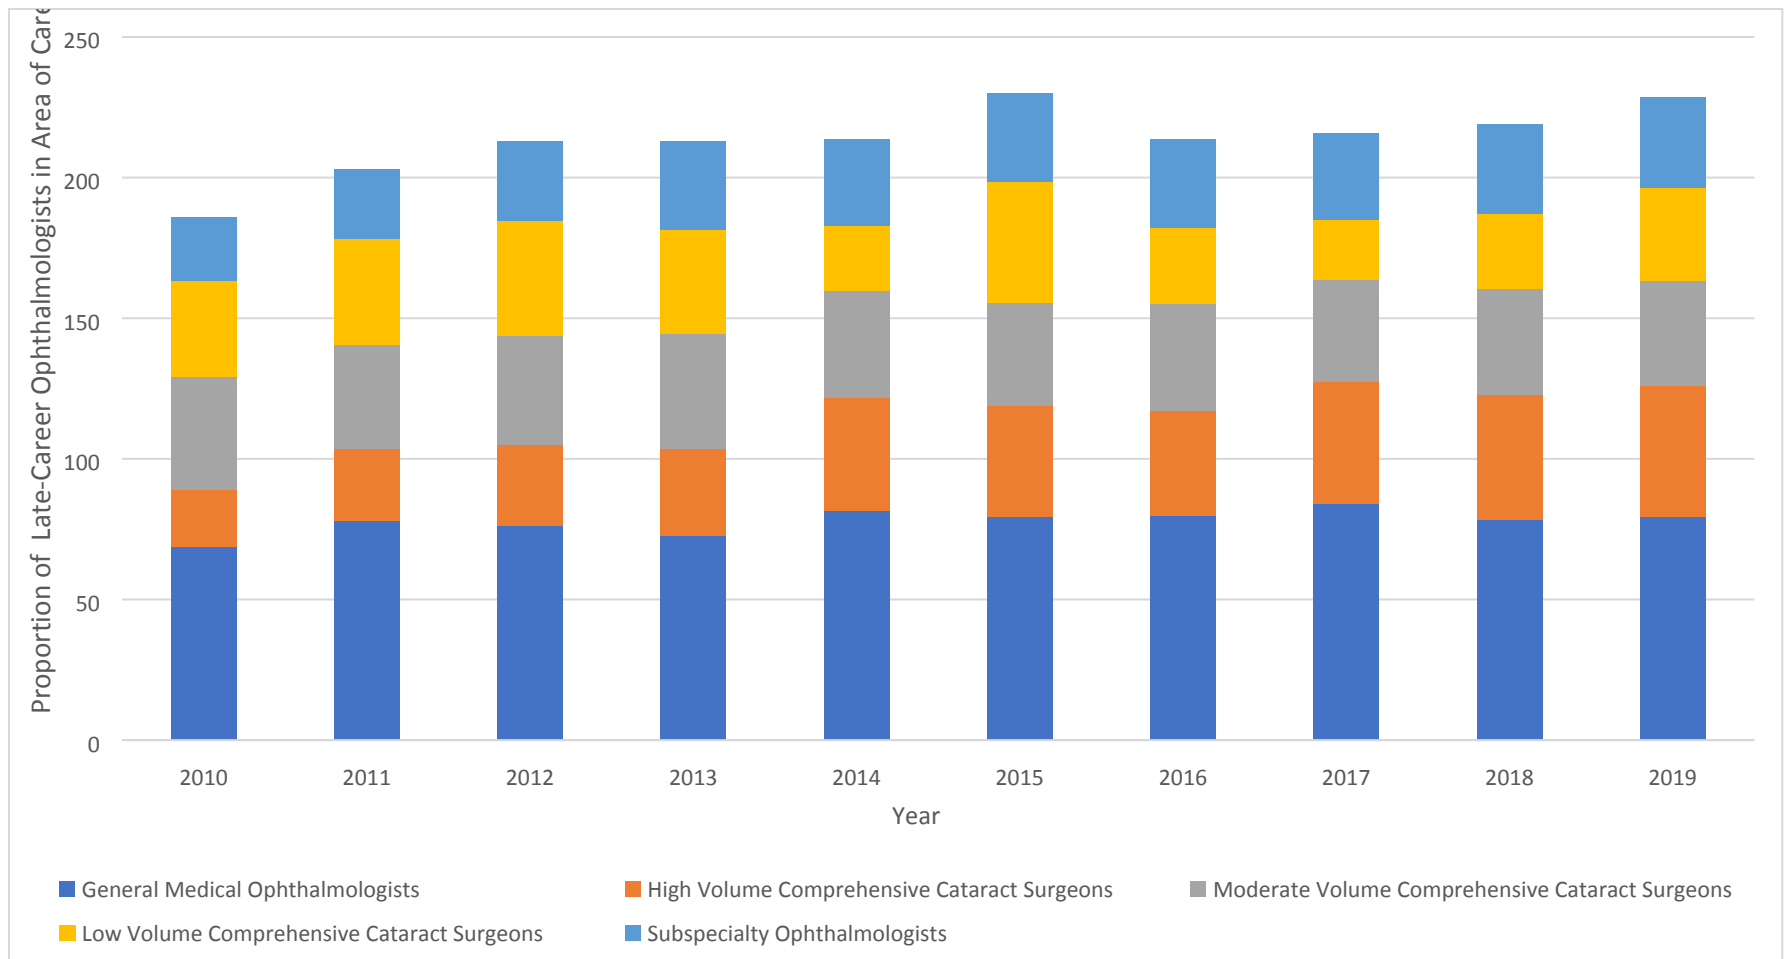

**Figure 4:** Trends in the proportion of late-career ophthalmologists practicing in subspecialty areas, general medical and comprehensive surgical areas of care from 2010-2019 fiscal years, inclusive

1  
2  
3  
4  
5  
6  
7  
8  
9  
10  
11  
12  
13  
14  
15  
16  
17  
18  
19  
20  
21  
22  
23  
24  
25  
26  
27  
28  
29  
30  
31  
32  
33  
34  
35  
36  
37  
38  
39  
40  
41  
42  
43  
44  
45  
46  
47

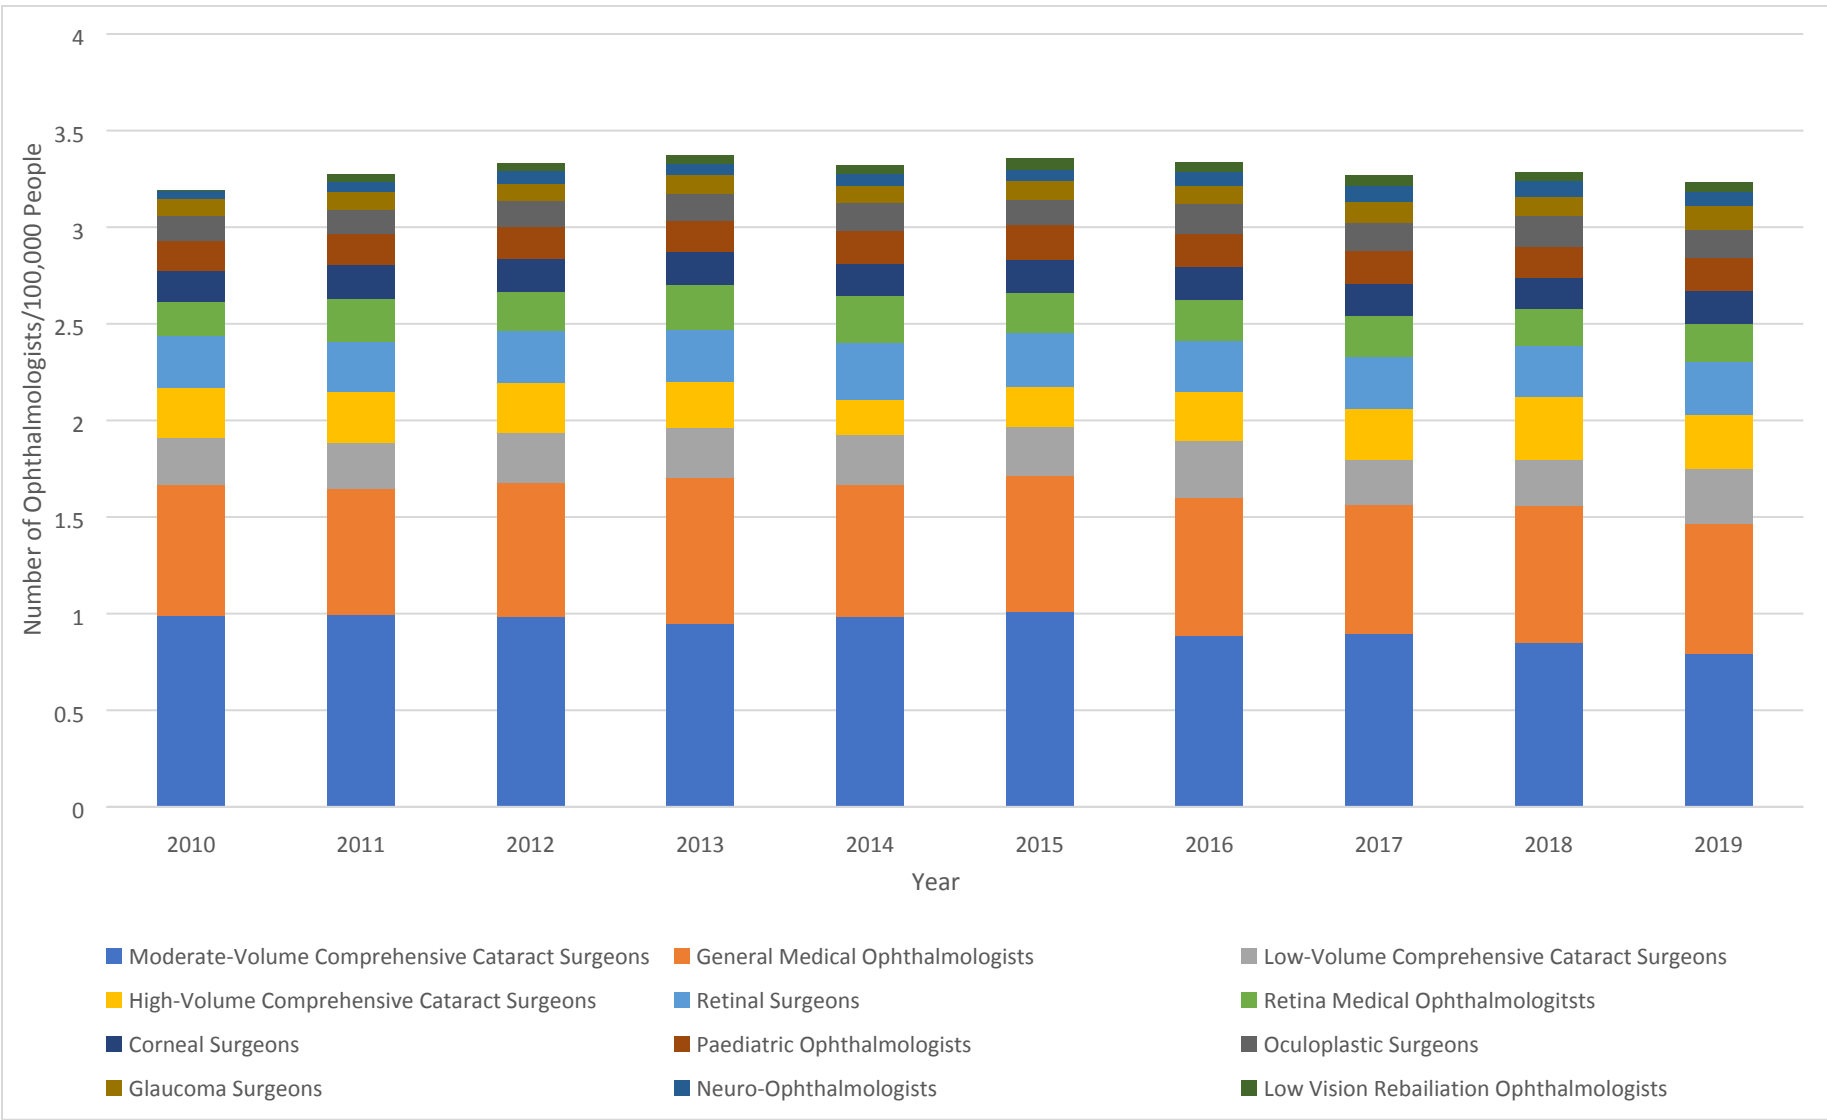

**Figure 5:** The number of ophthalmologists/100,000 people practicing in all areas of care from 2010-2019 fiscal years, inclusive.  
 \*The number of low vision rehabilitation ophthalmologists for the 2010 fiscal year was <5 and cannot be reported for privacy reasons

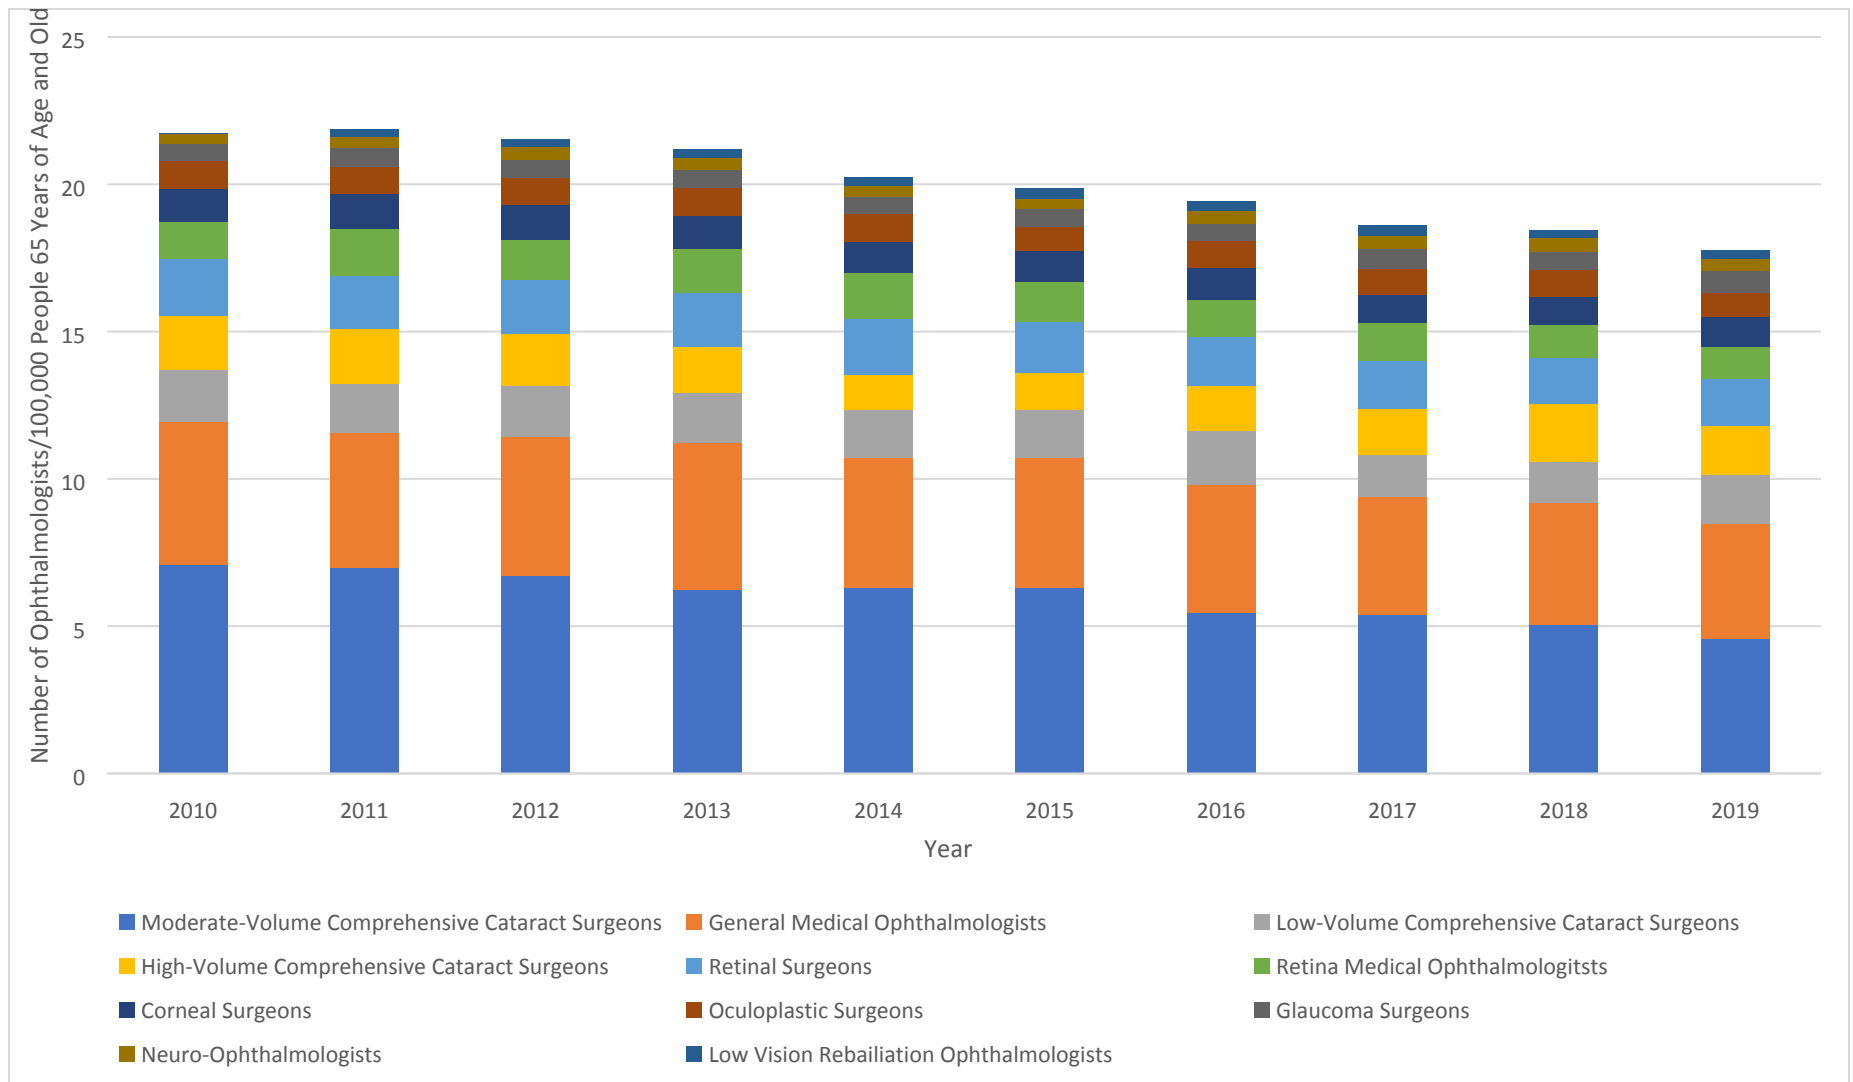

**Figure 6:** The number of ophthalmologists/100,000 people 65 years of age and older practicing in all areas of care from 2010-2019 fiscal years, inclusive  
 \*the number of low vision rehabilitation ophthalmologists for the 2010 fiscal year was <5 and cannot be reported for privacy reasons  
 \*\*given the nature of this analysis, paediatric ophthalmology was not analysed

1  
2  
3  
4  
5  
6  
7  
8  
9  
10  
11  
12  
13  
14  
15  
16  
17  
18  
19  
20  
21  
22  
23  
24  
25  
26  
27  
28  
29  
30  
31  
32  
33  
34  
35  
36  
37  
38  
39  
40  
41  
42  
43  
44  
45  
46  
47

|                                           |                                                                                                                                                                                                        |
|-------------------------------------------|--------------------------------------------------------------------------------------------------------------------------------------------------------------------------------------------------------|
| Neuro-ophthalmologist                     | ≥ 50 A/C/W231                                                                                                                                                                                          |
| Corneal surgeon                           | ≥ 10 E121, E122, E124 (any combination)                                                                                                                                                                |
| Glaucoma surgeon                          | ≥ 50 E132                                                                                                                                                                                              |
| Retina medical ophthalmologist            | ≥ 300 E147, E149 (any combination) AND ≥ 100 E154, EXCLUDING those who bill ANY ONE of the following retinal surgery codes E148, E142, E152                                                            |
| Retinal surgeon                           | ≥15 E142, E148, E152 (any combination)                                                                                                                                                                 |
| Oculoplastic surgeon                      | ≥ 20 E166, E167, E172, E168, E165, E169, E170, E160, E163, E176, E177, E178, E179, E180, E215, E216, E217, E218, E219 (any combination)                                                                |
| Pediatric ophthalmologist**               | ≥50 E159, E158, E162, E949, E952 OR ≥ 50% of all following code submissions A/C236, C235, A/C233, A/C234 conducted on pediatric patients AND does not meet the criteria of any of the above categories |
| Low vision rehabilitation ophthalmologist | ≥50 A252, A254 (any combination)                                                                                                                                                                       |

1  
2  
3  
4  
5  
6  
7  
8  
9  
10  
11  
12  
13  
14  
15  
16  
17  
18  
19  
20  
21  
22  
23  
24  
25  
26  
27  
28  
29  
30  
31  
32  
33  
34  
35  
36  
37  
38  
39  
40  
41  
42  
43  
44  
45  
46  
47

|                                                |                                                                                                                                                                                                                                                                                                                                                                                                     |
|------------------------------------------------|-----------------------------------------------------------------------------------------------------------------------------------------------------------------------------------------------------------------------------------------------------------------------------------------------------------------------------------------------------------------------------------------------------|
| Low-volume comprehensive cataract surgeon      | ≥1 but <200 E140 AND does not meet the criteria of any of the above categories                                                                                                                                                                                                                                                                                                                      |
| Moderate-volume comprehensive cataract surgeon | 200-800 E140 AND does not meet the criteria of any of the above categories                                                                                                                                                                                                                                                                                                                          |
| High-volume comprehensive cataract surgeon     | >800 E140 AND does not meet the criteria of any of the above categories                                                                                                                                                                                                                                                                                                                             |
| General medical ophthalmologist                | ≥100 A235, C235, W535, A233, C233, A234, C234, A253, A256, A236, C236, W536 (any combination), EXCLUDING THOSE WHO BILLED ANY one of the following surgical codes E132, E214, E940, E142, E148, E152, E121, E122, E124, E159, E158, E162, E140, E166, E167, E172, E168, E165, E169, E170, E160, E163, E176, E177, E178, E179, E180, E215, E216, E217, E218, E219 AND no fit into any above category |

**Supplementary Table 1:** Ontario Health Insurance Plan (OHIP) coding details of the classification criteria for the inclusion of ophthalmologists to an area of care in each fiscal year for 2010-2019 fiscal years, inclusive

\*All fee-for-service (FFS) and shadow billing professional claims were considered to capture ophthalmologists under different payment plans

\*\* Pediatric population considered patients younger than 18 years old

≥ means “Greater than or equal to”
